# Supplementary material
Source: publisher figshare collection journal article supplement (https://acs.figshare.com/ndownloader/files/5489858)
Supplement: Supplementary file 1 [file 5489858]

## Sheet: Transcriptome
Supplementary Data. The fragments per kilobase of transcript per million mapped reads (FPKM), fold change and p value of significantly changed transcripts determined by Cuffdiff (v0.0.7). AVGcontrol indicated the mean FPKM of transcripts from triplicated controls, AVGTBCO indicated the mean FPKM of transcripts from triplicated TBCO exposure groups, log2(FC) indicated log-transformed fold changes.
gene_id	gene	locus	AVGControl	AVGTBCO	log2(FC)	Fold Change	p_value	q_value	significant
XLOC_030481	5S_rRNA	scaffold3303:4944-5644	65.2885	3.60145	-4.18018	0.0551621	5e-05	0.00260708	yes
XLOC_000366	myo15ab	1:26254935-26315334	8.3259	2.02085	-2.04264	0.242719	5e-05	0.00260708	yes
XLOC_003249	ENSORLG00000013680	11:26268809-26272521	4.59508	1.77393	-1.37314	0.38605	5e-05	0.00260708	yes
XLOC_011585	epdl1 (3 of 4)	18:29677880-29694672	39.8716	15.931	-1.32352	0.399559	5e-05	0.00260708	yes
XLOC_002432	ENSORLG00000001159	11:2639039-2700397	0.774534	0.324614	-1.2546	0.41911	0.00135	0.048758	yes
XLOC_017034	asb15b	23:13279067-13285597	3.8005	1.62083	-1.22946	0.426477	5e-05	0.00260708	yes
XLOC_035099	ENSORLG00000020004	ultracontig70:2607-5646	11.677	5.32698	-1.13227	0.456197	5e-05	0.00260708	yes
XLOC_003946	ENSORLG00000012250	12:23152329-23155308	6.54235	3.02343	-1.11362	0.462133	0.00025	0.0115041	yes
XLOC_025408	PDE6H	8:10167273-10169344	18.1368	8.4295	-1.1054	0.464774	5e-05	0.00260708	yes
XLOC_024067	nr1d4a	7:12715762-12726588	4.95669	2.35278	-1.07501	0.474668	5e-05	0.00260708	yes
XLOC_005450	bco2b	13:19685323-19691625	1.91016	0.934469	-1.03147	0.489211	0.00055	0.0228643	yes
XLOC_007506	atoh7	15:29366023-29366855	7.963	4.05261	-0.974459	0.508931	0.00025	0.0115041	yes
XLOC_023020	ENSORLG00000013826	6:21437912-21446558	8.61292	4.62444	-0.897223	0.536919	0.00025	0.0115041	yes
XLOC_029721	rd3	scaffold2439:1369-3284	7.9222	4.38426	-0.853567	0.553415	0.0004	0.0172871	yes
XLOC_001891	ENSORLG00000003203	10:9920258-9951545	7.22541	4.08617	-0.82233	0.565528	5e-05	0.00260708	yes
XLOC_008771	ndrg1b	16:6729876-6734845	66.4849	37.8525	-0.81264	0.569339	5e-05	0.00260708	yes
XLOC_012286	tut1	19:2968333-2977492	6.91979	3.96432	-0.803655	0.572896	5e-05	0.00260708	yes
XLOC_025203	rcvrna	8:2569107-2581687	27.1523	15.588	-0.800636	0.574096	0.0005	0.0210144	yes
XLOC_004802	serpinf2b	13:9850491-9855547	5.69248	3.27434	-0.797853	0.575205	0.00015	0.00724052	yes
XLOC_017576	ola-mir-206	24:13640156-13642540	9.9904	5.77979	-0.789525	0.578535	0.00115	0.0426435	yes
XLOC_030864	ENSORLG00000019801	scaffold3791:2-4303	23.7267	13.8111	-0.780686	0.58209	0.0004	0.0172871	yes
XLOC_016822	kera	23:16910740-16914033	226.409	133.102	-0.7664	0.587883	5e-05	0.00260708	yes
XLOC_003115	si:dkey-222b8.4	11:18578627-18584544	8.69264	5.11857	-0.764052	0.58884	0.0003	0.01358	yes
XLOC_000093	C17orf67	1:4271783-4275443	22.6748	13.3995	-0.758909	0.590943	0.0006	0.0248078	yes
XLOC_010047	ENSORLG00000003950	17:4672919-4687174	13.0732	7.86002	-0.734003	0.601233	5e-05	0.00260708	yes
XLOC_020227	tmem47	4:9309896-9316025	11.7674	7.17293	-0.71416	0.60956	5e-05	0.00260708	yes
XLOC_003074	ndufs5	11:16464768-16467902	111.374	67.9921	-0.711975	0.610484	5e-05	0.00260708	yes
XLOC_006234	glra4b	14:17422444-17434872	3.98012	2.43101	-0.711258	0.610787	0.00075	0.0299168	yes
XLOC_003047	cacng6a	11:14755492-14766466	40.4128	24.7326	-0.708398	0.611999	0.0001	0.0049845	yes
XLOC_021305	nr1d4b	5:28034642-28043860	35.7434	21.9921	-0.700693	0.615277	5e-05	0.00260708	yes
XLOC_008397	rnf41l	16:14669629-14673172	8.47492	5.25457	-0.689626	0.620015	5e-05	0.00260708	yes
XLOC_014891	wap65	21:6930683-6940246	31.7641	19.6983	-0.689324	0.620144	5e-05	0.00260708	yes
XLOC_028316	txnipb	scaffold1409:13290-15899	25.1355	15.6293	-0.685475	0.621801	5e-05	0.00260708	yes
XLOC_018715	SCAMP5 (2 of 2)	3:26639532-26646406	32.2356	20.0524	-0.684877	0.622059	5e-05	0.00260708	yes
XLOC_000535	dusp5	1:39784217-39788505	21.0466	13.1704	-0.676282	0.625776	0.00015	0.00724052	yes
XLOC_018038	FDFT1	24:17066973-17074123	15.7783	9.92697	-0.668512	0.629155	5e-05	0.00260708	yes
XLOC_008395	tmem67	16:14596865-14605705	10.5707	6.65092	-0.668449	0.629183	0.0007	0.0282917	yes
XLOC_030018	cyp51	scaffold2764:5746-9822	22.1235	13.927	-0.667695	0.629512	5e-05	0.00260708	yes
XLOC_012196	btbd17a	19:20537791-20542886	18.234	11.5659	-0.656747	0.634307	5e-05	0.00260708	yes
XLOC_011039	DTX4 (2 of 2)	18:13978338-13993471	14.0912	8.96356	-0.652646	0.636113	5e-05	0.00260708	yes
XLOC_019779	ENSORLG00000008205	4:14389007-14395237	21.8815	13.9405	-0.65043	0.63709	0.0002	0.00940154	yes
XLOC_019619	hs2st1b	4:5010499-5029130	9.68919	6.18336	-0.647985	0.638171	0.0011	0.0411389	yes
XLOC_008382	fabp11b	16:13721141-13722483	80.726	51.6695	-0.643722	0.64006	5e-05	0.00260708	yes
XLOC_016837	OLGCAP1	23:17668865-17672819	13.8791	8.93798	-0.63489	0.64399	0.0002	0.00940154	yes
XLOC_016935	ARNTL2 (1 of 2)	23:2928228-2954178	19.5535	12.6166	-0.632102	0.645236	5e-05	0.00260708	yes
XLOC_026537	ENSORLG00000017588	9:31728545-31736953	43.0352	28.3194	-0.603725	0.658053	5e-05	0.00260708	yes
XLOC_021272	ENSORLG00000014088	5:27005073-27024321	155.035	102.353	-0.599035	0.660195	5e-05	0.00260708	yes
XLOC_024882	cbx8a	8:12480046-12482521	16.9781	11.2959	-0.587874	0.665323	5e-05	0.00260708	yes
XLOC_014601	tmem237a	21:16360252-16374995	46.3505	30.8456	-0.587522	0.665485	5e-05	0.00260708	yes
XLOC_005198	ompa	13:4066863-4089834	25.5485	17.0291	-0.585236	0.66654	0.00035	0.0154765	yes
XLOC_006795	serpinf1	14:24530667-24538227	28.7686	19.1761	-0.585185	0.666564	0.0004	0.0172871	yes
XLOC_034992	kfh-g	ultracontig62:1610466-1614099	759.756	509.028	-0.577793	0.669988	0.00015	0.00724052	yes
XLOC_001510	ENSORLG00000002195	10:7667255-7671453	26.1165	17.5088	-0.576877	0.670413	5e-05	0.00260708	yes
XLOC_007385	si:ch211-197k17.3	15:21794682-21801212	38.5351	25.9627	-0.569734	0.673741	5e-05	0.00260708	yes
XLOC_006785	ndufa2	14:24070406-24071945	82.8187	55.8886	-0.567403	0.67483	0.00085	0.0334687	yes
XLOC_032164	gnat1	scaffold587:127675-131518	233.37	157.795	-0.564568	0.676158	5e-05	0.00260708	yes
XLOC_022465	ARMCX3	6:16206174-16211519	15.5049	10.5013	-0.56216	0.677287	0.0001	0.0049845	yes
XLOC_034488	arl4d	ultracontig231:1376566-1378472	25.4968	17.3803	-0.552864	0.681666	0.0003	0.01358	yes
XLOC_003143	ENSORLG00000009759	11:19491284-19498509	30.4759	20.7817	-0.552355	0.681906	0.0002	0.00940154	yes
XLOC_027518	opn1sw1	scaffold1021:44544-46130	1140.48	780.379	-0.54739	0.684257	0.00065	0.0265518	yes
XLOC_008370	OSBPL3 (2 of 2)	16:13195790-13224246	10.0081	6.8531	-0.546337	0.684757	0.00105	0.0395595	yes
XLOC_014643	ENSORLG00000015927	21:20161412-20164589	11.622	7.96476	-0.54516	0.685315	0.0006	0.0248078	yes
XLOC_016036	fabp7a	22:7660070-7660960	119.163	81.7063	-0.544415	0.685669	0.0002	0.00940154	yes
XLOC_022410	cd9a	6:14053668-14059742	33.9072	23.2588	-0.543818	0.685953	0.0009	0.0348536	yes
XLOC_018807	ENSORLG00000000057	3:1105156-1107145	414.257	284.572	-0.541732	0.686946	5e-05	0.00260708	yes
XLOC_000995	cabp2a	1:35574723-35599798	65.1915	44.9187	-0.537369	0.689026	0.00025	0.0115041	yes
XLOC_010316	PRMT5	17:18048918-18060331	16.7108	11.55	-0.532882	0.691173	5e-05	0.00260708	yes
XLOC_007247	vsx1	15:11908458-11911457	48.0866	33.5513	-0.519267	0.697726	0.0002	0.00940154	yes
XLOC_019048	aqp9b	3:20033662-20044684	18.9365	13.2431	-0.515931	0.699341	0.00025	0.0115041	yes
XLOC_028218	tnpo3	scaffold1365:31729-35786	13.7089	9.58968	-0.515554	0.699524	0.0009	0.0348536	yes
XLOC_031531	atp6v1f	scaffold4780:2995-3924	164.593	115.138	-0.515541	0.699531	0.0004	0.0172871	yes
XLOC_008474	rcv1	16:16771555-16776338	108.694	76.1269	-0.513789	0.700381	0.0001	0.0049845	yes
XLOC_022623	ENSORLG00000015633	6:23362649-23369288	28.2327	19.7957	-0.51218	0.701162	0.0004	0.0172871	yes
XLOC_026121	CKMT2 (2 of 2)	9:6121417-6123994	354.251	248.82	-0.50967	0.702383	0.00035	0.0154765	yes
XLOC_002552	gngt1	11:9401857-9406582	538.72	378.561	-0.50901	0.702704	0.0004	0.0172871	yes
XLOC_001472	arl13a	10:6007782-6012156	29.519	20.7814	-0.506347	0.704003	0.00065	0.0265518	yes
XLOC_025048	ENSORLG00000014931	8:20305754-20307702	667.21	469.961	-0.5056	0.704367	0.001	0.0381938	yes
XLOC_022474	ARNTL2 (2 of 2)	6:16466526-16487211	19.2531	13.6263	-0.498694	0.707747	0.0001	0.0049845	yes
XLOC_016173	OLMA1	22:14027353-14030560	417.66	295.751	-0.497943	0.708116	0.0007	0.0282917	yes
XLOC_009799	col15a1b	17:20003481-20046196	13.4224	9.53315	-0.493622	0.71024	0.00105	0.0395595	yes
XLOC_006758	atp5l	14:22426403-22430382	217.584	154.582	-0.493205	0.710445	0.00025	0.0115041	yes
XLOC_012574	pde6g	19:20466232-20468964	82.9424	58.9378	-0.492916	0.710587	0.00015	0.00724052	yes
XLOC_022743	crabp1b	6:5182203-5196226	87.5973	62.5008	-0.487012	0.713501	0.001	0.0381938	yes
XLOC_008728	azin1a	16:2498570-2507275	22.3766	16.0271	-0.481477	0.716244	0.001	0.0381938	yes
XLOC_022932	rbm28	6:14994101-15002348	33.2417	23.8175	-0.480969	0.716496	0.0004	0.0172871	yes
XLOC_022837	tph1a	6:10571424-10576595	14.686	10.5342	-0.479358	0.717297	0.0012	0.0441227	yes
XLOC_020485	CC2D2A (2 of 2)	4:30492844-30506186	9.25548	6.6449	-0.478061	0.717942	0.0007	0.0282917	yes
XLOC_004060	ppiab	12:1521479-1524654	119.249	85.8127	-0.474709	0.719612	0.00045	0.0190969	yes
XLOC_003055	GNBP	11:15083928-15091516	232.938	167.686	-0.474186	0.719873	0.0005	0.0210144	yes
XLOC_019830	C1orf52	4:18417822-18420349	24.2783	17.488	-0.473301	0.720315	0.00135	0.048758	yes
XLOC_034623	rftn2	ultracontig244:16235-25793	20.4735	14.7545	-0.472609	0.72066	0.00075	0.0299168	yes
XLOC_018619	calb2b	3:20515076-20528695	137.839	99.5204	-0.469921	0.722004	0.0004	0.0172871	yes
XLOC_014503	neurod	21:8189252-8192871	110.405	79.83	-0.467801	0.723066	0.0001	0.0049845	yes
XLOC_024866	cdr2a	8:11848195-11853786	26.2252	18.9839	-0.466179	0.723879	0.00125	0.0455773	yes
XLOC_024127	slc12a5b	7:16865059-16906860	19.6414	14.2544	-0.462483	0.725736	0.0009	0.0348536	yes
XLOC_017517	rps29	24:9045545-9047263	704.37	519.087	-0.440358	0.736952	0.0011	0.0411389	yes
XLOC_009836	rorcb	17:22825134-22841488	78.923	58.4421	-0.433437	0.740496	0.0012	0.0441227	yes
XLOC_030042	ENSORLG00000019536	scaffold2784:440-12137	1.7773	0	#NAME?		5e-05	0.00260708	yes
XLOC_008732	5S_rRNA	16:3162313-3162433	123.346	0	#NAME?		5e-05	0.00260708	yes
XLOC_013973	kmt2ca	20:2785218-2839447	7.6387	10.213	0.419014	1.33701	0.0011	0.0411389	yes
XLOC_014858	sdpra	21:2183824-2200250	14.8059	20.1413	0.44399	1.36036	0.00105	0.0395595	yes
XLOC_029718	MYH13 (8 of 11)	scaffold2438:1561-6713	50.3018	68.4681	0.444823	1.36115	0.0009	0.0348536	yes
XLOC_018944	fn1b	3:12888394-12908700	5.12756	6.9818	0.445327	1.36162	0.0011	0.0411389	yes
XLOC_005009	dner	13:22196378-22220060	18.7783	25.6067	0.447458	1.36364	0.00045	0.0190969	yes
XLOC_020061	xpr1	4:34219878-34284042	17.8848	24.5245	0.455489	1.37125	0.00105	0.0395595	yes
XLOC_032114	ENSORLG00000019717	scaffold5730:0-3427	48.5207	66.9266	0.463981	1.37934	0.001	0.0381938	yes
XLOC_000036	myh9a	1:1970390-1996361	7.09567	9.78901	0.464224	1.37958	0.00055	0.0228643	yes
XLOC_027900	ENSORLG00000020480	scaffold1219:895-6643	32.8588	45.5248	0.470375	1.38547	0.0004	0.0172871	yes
XLOC_008464	SHISA7 (2 of 2)	16:16442213-16449606	7.40381	10.2971	0.475904	1.39079	0.0009	0.0348536	yes
XLOC_006020	hspa4a	14:5585172-5597083	21.1615	29.4426	0.476462	1.39133	0.00075	0.0299168	yes
XLOC_008557	APOA4 (3 of 3)	16:19384075-19385355	174.432	243.457	0.481003	1.39571	0.00125	0.0455773	yes
XLOC_025658	ppp1r9b	8:23235688-23256134	6.7338	9.42629	0.485268	1.39985	0.0009	0.0348536	yes
XLOC_035479	krt1-19d	ultracontig95:212663-215575	96.891	136.511	0.494578	1.40891	0.00045	0.0190969	yes
XLOC_025635	junbb	8:21581695-21583264	14.6855	20.6944	0.494851	1.40918	0.00105	0.0395595	yes
XLOC_002815	hpcal4	11:24976125-25000580	7.22026	10.2041	0.499025	1.41326	0.0005	0.0210144	yes
XLOC_007461	ENSORLG00000011865	15:26397101-26398641	76.953	109.107	0.50369	1.41784	0.0002	0.00940154	yes
XLOC_000154	TNRC6C (1 of 2)	1:11587984-11632109	4.96424	7.05725	0.507534	1.42162	0.0002	0.00940154	yes
XLOC_007301	perp	15:16010610-16023656	11.905	16.9656	0.511049	1.42509	0.0011	0.0411389	yes
XLOC_001606	egr1	10:13218016-13243770	21.483	30.6873	0.514447	1.42845	0.0004	0.0172871	yes
XLOC_006715	si:dkey-169l5.3	14:19749317-19834905	7.97206	11.4146	0.517858	1.43183	0.0005	0.0210144	yes
XLOC_016095	grhl1	22:11146814-11163245	5.63076	8.08367	0.52168	1.43563	0.00085	0.0334687	yes
XLOC_023811	fam120c	7:26523340-26542574	3.97326	5.70521	0.521956	1.4359	0.00115	0.0426435	yes
XLOC_015873	arhgap5	22:23747937-23802030	5.23576	7.53851	0.52588	1.43981	0.00025	0.0115041	yes
XLOC_000460	krt15	1:31982813-31985104	278.014	400.493	0.52662	1.44055	0.00045	0.0190969	yes
XLOC_001846	npas4a	10:7435250-7440845	4.07641	5.87325	0.52686	1.44079	0.0005	0.0210144	yes
XLOC_006712	vamp2	14:19681732-19687947	101.105	146.226	0.532349	1.44628	5e-05	0.00260708	yes
XLOC_026294	aqp3a	9:15007128-15013027	37.2916	54.2732	0.541391	1.45538	5e-05	0.00260708	yes
XLOC_033327	ENSORLG00000019209	scaffold853:52500-54694	10.7505	15.6621	0.542872	1.45687	0.0012	0.0441227	yes
XLOC_006781	camk2a	14:23962675-23998956	9.29508	13.5638	0.545219	1.45924	0.00015	0.00724052	yes
XLOC_017533	hsf2	24:9985575-9994590	5.27256	7.73528	0.552949	1.46708	0.0008	0.0317043	yes
XLOC_004952	acsl3a	13:18160115-18186149	4.55712	6.6946	0.554874	1.46904	0.00055	0.0228643	yes
XLOC_004885	slc1a5	13:14288038-14293597	11.1544	16.4505	0.560516	1.4748	0.0004	0.0172871	yes
XLOC_005056	serpinh1b	13:27993483-27997108	17.0201	25.1711	0.564526	1.4789	5e-05	0.00260708	yes
XLOC_015861	atrn	22:22266378-22357956	2.95519	4.39588	0.572904	1.48751	0.0011	0.0411389	yes
XLOC_022991	kiaa1549la	6:18839837-18936063	7.22584	10.7766	0.576662	1.49139	0.00045	0.0190969	yes
XLOC_024816	EPN3	8:9735553-9745114	5.7793	8.6344	0.579202	1.49402	0.0003	0.01358	yes
XLOC_021659	abraa	5:17452482-17458881	6.98863	10.4467	0.579968	1.49482	0.0002	0.00940154	yes
XLOC_034500	g6pca.2	ultracontig231:1323212-1325949	39.3174	58.9458	0.584221	1.49923	0.00015	0.00724052	yes
XLOC_018907	abhd2a	3:11252295-11269459	14.5105	21.7639	0.584836	1.49987	5e-05	0.00260708	yes
XLOC_022577	ANPEP (2 of 4),anpepb	6:22383738-22416636	4.47	6.7718	0.599265	1.51494	0.00035	0.0154765	yes
XLOC_034881	c1qtnf4	ultracontig37:190119-190881	19.7168	29.9409	0.602689	1.51854	0.00065	0.0265518	yes
XLOC_007185	epcam (1 of 2)	15:6035935-6038327	46.3351	70.7616	0.610863	1.52717	5e-05	0.00260708	yes
XLOC_023873	krt5	7:3198231-3218982	406.337	622.219	0.614745	1.53129	0.00075	0.0299168	yes
XLOC_027619	pkd1	scaffold1073:14295-56023	1.79969	2.75793	0.615836	1.53245	0.0001	0.0049845	yes
XLOC_005477	por	13:21787847-21801998	20.6667	31.903	0.626385	1.54369	5e-05	0.00260708	yes
XLOC_024628	zgc:165423 (1 of 4),zgc:165423 (4 of 4)	8:498965-588081	9.17007	14.225	0.63342	1.55124	0.0003	0.01358	yes
XLOC_004937	ZFP36	13:17330955-17334661	6.80855	10.6754	0.648872	1.56794	0.00015	0.00724052	yes
XLOC_004866	capn12	13:13493108-13500233	5.55137	8.81034	0.666354	1.58706	0.0007	0.0282917	yes
XLOC_033426	ACTA2	scaffold884:49354-54895	46.1124	73.2757	0.668179	1.58907	5e-05	0.00260708	yes
XLOC_016184	spint1a	22:14469140-14476561	4.17175	6.65048	0.672805	1.59417	0.00035	0.0154765	yes
XLOC_017798	dlgap2b	24:4455304-4526188	4.50765	7.186	0.672813	1.59418	0.0003	0.01358	yes
XLOC_008466	dbpb	16:16465221-16472299	5.17259	8.30364	0.682858	1.60532	5e-05	0.00260708	yes
XLOC_025227	lrrc4ba	8:3345032-3385189	1.74451	2.80187	0.683569	1.60611	0.0007	0.0282917	yes
XLOC_021759	gdf11	5:27666695-27687835	3.82381	6.14538	0.684492	1.60714	0.0002	0.00940154	yes
XLOC_034366	itgb4	ultracontig221:430992-447994	2.26669	3.65365	0.688748	1.61188	0.0001	0.0049845	yes
XLOC_034537	ENSORLG00000018900	ultracontig235:102783-134736	2.5847	4.1889	0.696573	1.62065	0.00045	0.0190969	yes
XLOC_023433	mgll	7:6744439-6777023	10.0903	16.5675	0.715384	1.64192	5e-05	0.00260708	yes
XLOC_015056	abca12	21:21267179-21329101	3.5461	5.85794	0.724161	1.65194	5e-05	0.00260708	yes
XLOC_019637	ENSORLG00000002986	4:6130368-6140784	1.2773	2.12749	0.736056	1.66562	0.0008	0.0317043	yes
XLOC_009118	rab11al	16:26205474-26214605	7.37009	12.2827	0.736873	1.66656	0.0001	0.0049845	yes
XLOC_012150	ENSORLG00000011820	19:16265220-16289204	1.65626	2.76092	0.737225	1.66697	0.00125	0.0455773	yes
XLOC_029407	MYO5B	scaffold2189:7512-13699	2.8765	4.79749	0.737965	1.66782	0.00115	0.0426435	yes
XLOC_000666	zgc:92061	1:10218234-10221875	6.93198	11.6614	0.750406	1.68227	5e-05	0.00260708	yes
XLOC_022508	fa2h	6:18448713-18479161	3.66046	6.17002	0.753252	1.68559	5e-05	0.00260708	yes
XLOC_021325	per3	5:29282856-29299663	12.5485	21.1935	0.756102	1.68892	5e-05	0.00260708	yes
XLOC_015776	si:dkey-157l19.2	22:14697688-14702324	1.88356	3.18711	0.758786	1.69207	5e-05	0.00260708	yes
XLOC_021184	ENSORLG00000010573,ENSORLG00000010585	5:19266752-19285174	4.35477	7.36975	0.759019	1.69234	0.00035	0.0154765	yes
XLOC_006625	DCLK2 (2 of 3)	14:14980529-14993291	4.25524	7.24741	0.768224	1.70317	0.0008	0.0317043	yes
XLOC_007204	si:ch211-125o16.4	15:8846024-8851115	1.86761	3.1934	0.773897	1.70988	0.0001	0.0049845	yes
XLOC_008337	nphs1	16:12294629-12330924	1.24472	2.15376	0.79104	1.73032	0.00025	0.0115041	yes
XLOC_014056	hnf4g	20:12143911-12151619	2.91672	5.04877	0.791586	1.73098	0.0003	0.01358	yes
XLOC_003998	CEL (1 of 3)	12:26977190-26984541	3.10647	5.38152	0.792739	1.73236	0.00075	0.0299168	yes
XLOC_011024	plcb3	18:12207451-12247030	1.4651	2.53906	0.793293	1.73303	0.0001	0.0049845	yes
XLOC_002567	rftn1a	11:10214701-10246371	1.66785	2.89384	0.794998	1.73507	0.00085	0.0334687	yes
XLOC_026161	elovl7a	9:8606172-8609189	4.08202	7.08273	0.795021	1.7351	0.00105	0.0395595	yes
XLOC_006359	ppm1e	14:28564388-28615356	3.17998	5.54381	0.801861	1.74335	5e-05	0.00260708	yes
XLOC_024240	cebpb	7:22318783-22320559	8.62673	15.2307	0.820092	1.76552	5e-05	0.00260708	yes
XLOC_012157	tbkbp1	19:17341220-17372634	1.73352	3.06835	0.823758	1.77001	0.0005	0.0210144	yes
XLOC_022378	DNAJA4	6:11888104-11891276	36.0298	63.8956	0.826524	1.77341	5e-05	0.00260708	yes
XLOC_010111	larp4b	17:8530190-8577974	3.10838	5.51292	0.826653	1.77357	5e-05	0.00260708	yes
XLOC_021552	NDUFA4L2 (2 of 2)	5:9725545-9732368	4.2225	7.50596	0.829938	1.77761	0.00065	0.0265518	yes
XLOC_003094	pkhd1l1	11:16819625-16862077	1.10573	1.981	0.841227	1.79157	5e-05	0.00260708	yes
XLOC_025288	itgb3a	8:5688676-5703830	2.6374	4.75447	0.850168	1.80271	5e-05	0.00260708	yes
XLOC_010063	CLDN1	17:5534234-5538098	10.1558	18.365	0.85466	1.80833	5e-05	0.00260708	yes
XLOC_006857	zgc:136851	14:32354148-32374171	3.06981	5.57887	0.861823	1.81733	5e-05	0.00260708	yes
XLOC_002966	CIART (1 of 3)	11:5740804-5745056	2.08879	3.80127	0.863814	1.81984	0.0003	0.01358	yes
XLOC_011234	si:dkeyp-75b4.10	18:1211399-1218214	65.8838	120.055	0.865696	1.82222	5e-05	0.00260708	yes
XLOC_001426	ENSORLG00000000538	10:2004230-2006697	4.81414	8.79778	0.86986	1.82749	0.0002	0.00940154	yes
XLOC_024251	ankrd52a	7:22707113-22722578	1.26439	2.31431	0.872144	1.83038	0.00015	0.00724052	yes
XLOC_006230	ENSORLG00000009528	14:17285759-17288557	1.65843	3.04995	0.878967	1.83906	0.00125	0.0455773	yes
XLOC_008898	abcb4	16:14848838-14857523	1.45348	2.68017	0.882813	1.84397	0.00105	0.0395595	yes
XLOC_031729	5_8S_rRNA	scaffold5089:2668-2822	179.646	331.776	0.885054	1.84683	0.00085	0.0334687	yes
XLOC_033713	ENSORLG00000018638	scaffold999:32950-61470	12.6741	23.6052	0.897225	1.86248	0.0007	0.0282917	yes
XLOC_000073	ENSORLG00000001411	1:3244185-3258177	13.9689	26.9573	0.948454	1.9298	5e-05	0.00260708	yes
XLOC_005358	tmprss13a	13:14554485-14562670	2.70371	5.22178	0.949602	1.93134	0.0001	0.0049845	yes
XLOC_025160	hsp70.3	8:486177-489049	9.59457	18.5346	0.949932	1.93178	5e-05	0.00260708	yes
XLOC_021474	lmcd1	5:5288759-5305966	0.982611	1.90576	0.955676	1.93949	0.0013	0.0472875	yes
XLOC_015639	ISYNA1	22:8613401-8617546	4.37691	8.52583	0.961929	1.94791	5e-05	0.00260708	yes
XLOC_011133	si:dkeyp-93a5.2	18:21127826-21132429	40.3355	78.7969	0.966089	1.95354	5e-05	0.00260708	yes
XLOC_008536	ceacam1	16:18351449-18366774	1.54172	3.02801	0.97383	1.96405	0.001	0.0381938	yes
XLOC_026092	ENSORLG00000001755	9:4560774-4562079	5.64087	11.172	0.985905	1.98056	5e-05	0.00260708	yes
XLOC_005431	PITPNA (2 of 2)	13:18995261-19004676	6.55812	13.0327	0.990783	1.98726	5e-05	0.00260708	yes
XLOC_023468	ela2l	7:8456781-8460046	8.65549	17.2298	0.993223	1.99063	5e-05	0.00260708	yes
XLOC_021428	erbb3a	5:2228014-2244939	0.94198	1.87961	0.996667	1.99538	0.0001	0.0049845	yes
XLOC_026499	ENSORLG00000017168	9:29853588-29856416	3.74394	7.51103	1.00445	2.00618	0.00035	0.0154765	yes
XLOC_019209	hce	3:32110911-32118224	51.1413	102.743	1.00648	2.009	5e-05	0.00260708	yes
XLOC_027037	NLRP6 (6 of 8)	9:28711683-28716940	1.45686	2.9467	1.01624	2.02264	0.0002	0.00940154	yes
XLOC_004868	fosb	13:13516305-13522329	1.78704	3.70569	1.05217	2.07365	5e-05	0.00260708	yes
XLOC_015536	ENSORLG00000010013	22:1452492-1460432	0.910694	1.89066	1.05385	2.07606	0.00035	0.0154765	yes
XLOC_026606	HSPB3 (1 of 2)	9:2763158-2765889	2.17225	4.55896	1.06951	2.09872	0.0002	0.00940154	yes
XLOC_017144	ENSORLG00000017191	23:22824939-22831132	1.25702	2.68042	1.09245	2.13236	5e-05	0.00260708	yes
XLOC_033727	soul2 (2 of 2)	ultracontig1:355563-356673	3.11991	6.69595	1.10179	2.14621	0.0001	0.0049845	yes
XLOC_023639	ENSORLG00000010185	7:16786826-16790880	0.788745	1.72006	1.12483	2.18076	0.00135	0.048758	yes
XLOC_013908	APOD (3 of 6)	20:22062755-22067598	3.14638	6.89107	1.13104	2.19017	0.0003	0.01358	yes
XLOC_003261	ME-T	11:26715855-26718219	1.64877	3.61432	1.13233	2.19212	5e-05	0.00260708	yes
XLOC_009002	TRYP	16:18745975-18747377	4.45037	9.97158	1.1639	2.24062	5e-05	0.00260708	yes
XLOC_035153	CPA1 (2 of 2)	ultracontig72:2835382-2840472	2.26803	5.08562	1.16498	2.2423	0.0002	0.00940154	yes
XLOC_021281	mst1rb	5:27152581-27171648	0.754933	1.72312	1.19061	2.28249	5e-05	0.00260708	yes
XLOC_000625	ENSORLG00000001396	1:3233033-3235798	14.1699	32.9133	1.21584	2.32276	5e-05	0.00260708	yes
XLOC_018396	mc6ast2	3:3408501-3413797	3.6329	8.45042	1.2179	2.32608	0.00015	0.00724052	yes
XLOC_035329	gpr37l1b	ultracontig89:217958-226072	2.28719	5.43747	1.24936	2.37736	0.00015	0.00724052	yes
XLOC_031415	ENSORLG00000019857	scaffold4602:636-3594	8.02877	19.1071	1.25086	2.37983	5e-05	0.00260708	yes
XLOC_014132	cpb1	20:16653130-16656888	3.9185	9.33345	1.25211	2.3819	5e-05	0.00260708	yes
XLOC_002471	ENSORLG00000002102	11:4535953-4567030	14.0184	33.8855	1.27335	2.41722	0.0001	0.0049845	yes
XLOC_005994	ENSORLG00000000766	14:1972671-1974497	1.81942	4.57236	1.32946	2.51309	5e-05	0.00260708	yes
XLOC_012347	si:dkey-32n7.7	19:6959125-6961915	0.879894	2.26508	1.36416	2.57426	0.00125	0.0455773	yes
XLOC_008549	TRYP	16:18752588-18753991	2.93502	7.58242	1.36929	2.58343	5e-05	0.00260708	yes
XLOC_018404	ctrb1	3:4160668-4162937	2.69388	7.04495	1.3869	2.61516	5e-05	0.00260708	yes
XLOC_018627	rh50	3:20684607-20688909	3.80668	10.118	1.41031	2.65794	5e-05	0.00260708	yes
XLOC_021086	CELA1 (1 of 2)	5:13105665-13114683	1.24394	3.61955	1.54089	2.90974	0.0003	0.01358	yes
XLOC_018046	C-FOS	24:17368559-17370377	6.34756	18.7252	1.56071	2.94999	5e-05	0.00260708	yes
XLOC_010544	APOD (6 of 6)	17:31347121-31349028	5.08522	15.022	1.5627	2.95406	5e-05	0.00260708	yes
XLOC_000675	MAL (1 of 3)	1:10734524-10739719	2.02429	6.05164	1.57991	2.98951	5e-05	0.00260708	yes
XLOC_011409	per1	18:15188831-15206090	1.2513	3.79919	1.60226	3.03619	5e-05	0.00260708	yes
XLOC_021087	CELA1 (2 of 2)	5:13120634-13123382	1.25463	4.03535	1.68544	3.21638	5e-05	0.00260708	yes
XLOC_022192	cpa2	6:1803553-1808706	0.600231	2.15412	1.84351	3.58882	5e-05	0.00260708	yes
XLOC_000434	tekt4	1:31026612-31035749	0.557592	2.04029	1.87149	3.6591	5e-05	0.00260708	yes
XLOC_009609	ftr66 (8 of 39)	17:8231873-8233800	0.287724	1.11643	1.95613	3.8802	0.0012	0.0441227	yes
XLOC_028647	ENSORLG00000020385	scaffold1672:5917-9230	0.35647	1.76299	2.30617	4.94568	0.0002	0.00940154	yes
XLOC_000456	trak2	1:31940720-31940915	0	2.62555	inf		0.00105	0.0395595	yes

## Sheet: Proteome
Supplementary Data.The spectral counts, fold change and p values of significantly changed proteins from MaxQuant search engine. ensembl ID indnicated the ensembl ID of detected proteins assigned by BioMart. AVG_Control indicated the mean spectral counts of proteins from four control samples, AVG_TBCO indicated the mean spectral counts of proteins from TBCO exposure groups, Fold Change_TBCO indica…
ensembl ID	Gene ID	AVG_Control	AVG_TBCO	Fold Change_TBCO	p value
ENSORLG00000011892	hsp90ab1	13.0908	0.236497	0.0180659	3.28043e-06
ENSORLG00000002122	atp1a1a.4	10.3311	0.236497	0.0228918	0.00375367
ENSORLG00000018557	atp1a1a.4	9.76763	0.236497	0.0242123	0.00121997
ENSORLG00000017533	HSP90AA1	8.83158	0.236497	0.0267786	0.0132007
ENSORLG00000009205	apoea	7.30382	0.236497	0.0323799	0.0353258
ENSORLG00000012653	apobb	17.7783	0.602395	0.0338838	0.000395439
ENSORLG00000017525	HSP90AA1	6.4687	0.236497	0.0365602	0.0104413
ENSORLG00000000607	rps3	6.24536	0.236497	0.0378676	0.0250555
ENSORLG00000019559	YWHAB	28.3526	1.23775	0.0436555	0.00537503
ENSORLG00000008592	uba1	5.32767	0.236497	0.0443903	0.0052564
ENSORLG00000020431	YWHAG	5.28518	0.236497	0.0447471	0.0283786
ENSORLG00000006097	suclg1	5.05595	0.236497	0.0467759	0.000183052
ENSORLG00000008517	VCL	4.68341	0.236497	0.0504967	0.0310724
ENSORLG00000013191	ATP1A3	13.6582	0.771283	0.0564701	0.00524584
ENSORLG00000005670	tubb1	7.08051	0.405385	0.0572536	0.0241241
ENSORLG00000016863	uqcrc1	0.156381	0.01	0.0639462	0.0128027
ENSORLG00000012987	tubb5	38.7704	2.52446	0.0651129	0.00282813
ENSORLG00000007681	RPS3A	3.59483	0.236497	0.0657881	0.00723092
ENSORLG00000006948	TUBB	37.8586	2.52446	0.0666811	0.00274965
ENSORLG00000007967	RPL7	8.36902	0.562198	0.0671761	0.000442137
ENSORLG00000002452	fkbp1ab	3.24646	0.236497	0.0728475	0.00885165
ENSORLG00000007053	tubb4b	42.6269	3.14512	0.0737825	0.00172487
ENSORLG00000008802	rpl21	5.29935	0.39331	0.0742187	0.0105429
ENSORLG00000016308	zgc:123194	40.8516	3.14512	0.0769888	0.00124296
ENSORLG00000004338	ywhag2	17.4157	1.46293	0.0840008	0.00300424
ENSORLG00000017734		43.5488	3.99756	0.0917949	0.000505876
ENSORLG00000013195	tcp1	14.6669	1.39195	0.0949037	0.000343703
ENSORLG00000017113		40.3931	3.9887	0.0987471	0.000365738
ENSORLG00000015250	ywhaqb	11.8588	1.23775	0.104374	0.000530314
ENSORLG00000001350	krt5	12.819	1.44749	0.112918	0.00844554
ENSORLG00000014794	fabp10a	3.32311	0.39331	0.118356	0.0192664
ENSORLG00000002907	eif5a	8.04898	0.957678	0.118981	0.000202597
ENSORLG00000012745	ca2	6.44455	0.771283	0.11968	0.0267106
ENSORLG00000008130	rpl15	3.24646	0.39331	0.12115	0.00744137
ENSORLG00000002047	atp1a1b	13.3241	1.62438	0.121913	0.000352146
ENSORLG00000012638	apoba	10.6895	1.43074	0.133845	5.86884e-05
ENSORLG00000003475	tubb6	17.1682	2.31537	0.134864	0.00302479
ENSORLG00000009488	cox4i1	4.45415	0.602395	0.135243	0.000278735
ENSORLG00000002954		9.0992	1.23775	0.136028	0.013193
ENSORLG00000019642		4.16828	0.602395	0.144519	0.0324588
ENSORLG00000009763		7.95812	1.23775	0.155533	0.00406741
ENSORLG00000009024	mknk2a	3.55234	0.630568	0.177508	0.0416693
ENSORLG00000016108	tuba8l3	33.979	6.41677	0.188845	0.00116654
ENSORLG00000009584	rps4x	4.11998	0.787382	0.191113	0.0332006
ENSORLG00000009193	APOA4	3.55644	0.697083	0.196006	0.0306069
ENSORLG00000018521		25.493	5.07066	0.198904	0.000425101
ENSORLG00000008282	fabp11b	6.81712	1.38026	0.202469	0.00866724
ENSORLG00000009905	S100A11	5.94357	1.2223	0.205651	0.000194102
ENSORLG00000014703	nme2a	10.8287	2.22829	0.205776	0.00508069
ENSORLG00000005938	atp2a1l	51.0497	10.8828	0.213181	0.0039667
ENSORLG00000001982	flna	6.47282	1.39195	0.215045	0.0266654
ENSORLG00000009261	rps2	3.92494	0.855752	0.21803	0.0311869
ENSORLG00000010772	atp2a2b	8.3407	1.8489	0.221673	0.00235027
ENSORLG00000009168	echs1	2.66884	0.602395	0.225714	0.00426347
ENSORLG00000002858	tuba8l4	41.3938	9.49087	0.229283	0.000988699
ENSORLG00000003020	GB	49.8217	11.4511	0.229842	0.00428865
ENSORLG00000013999	apoa2	34.9849	8.21276	0.234752	8.11953e-05
ENSORLG00000015888	atp2a2a	4.15826	0.980368	0.235764	0.00430013
ENSORLG00000020526	pdxka	10.4221	2.47616	0.237588	0.038454
ENSORLG00000017908	ckba	9.54844	2.29993	0.240869	0.001276
ENSORLG00000015000	tuba8l	3.84824	0.957678	0.248862	0.0165428
ENSORLG00000002646	ywhabl	11.4863	2.97482	0.258989	0.0139018
ENSORLG00000002169	rps5	15.287	4.02531	0.263316	0.00209174
ENSORLG00000011700	atp2a3	6.83714	1.8489	0.270421	0.0102624
ENSORLG00000013217	vmhc	0.60129	0.162771	0.270703	0.00582007
ENSORLG00000005267	GB-ALPHA3	5.91531	1.65657	0.280049	0.00347559
ENSORLG00000003819	atic	25.3083	7.28531	0.287863	0.0183814
ENSORLG00000007578	rpl11	4.18244	1.20555	0.288241	0.0122413
ENSORLG00000001591	ckmb	239.468	69.9829	0.292243	0.00825329
ENSORLG00000013060	myhz2	9.97275	2.91541	0.292338	0.0366378
ENSORLG00000016016	tuba2	46.7698	13.7327	0.293623	0.00549048
ENSORLG00000001698	p4hb	12.1548	3.58663	0.29508	0.00522233
ENSORLG00000003613	ol-gb1	12.0923	3.56988	0.295219	0.0262119
ENSORLG00000000449	ckma	231.487	68.4768	0.295813	0.0088077
ENSORLG00000014063	pgk1	20.5824	6.1234	0.297506	0.0308763
ENSORLG00000012163	atp2a1	16.3755	4.89966	0.299206	0.0035643
ENSORLG00000012859	ahcy	10.847	3.34251	0.308152	0.0182428
ENSORLG00000006708	ak1	20.4372	6.41743	0.314007	0.0167663
ENSORLG00000000559	TNNI2	3.83819	1.20555	0.314093	0.013326
ENSORLG00000016442	TUBA1C	43.5233	13.7327	0.315525	0.00884984
ENSORLG00000004389	sod1	10.9371	3.48992	0.319091	0.0129813
ENSORLG00000012163		13.9884	4.48149	0.320371	0.00270388
ENSORLG00000010283	ywhaba	28.1011	9.02863	0.321291	0.00435352
ENSORLG00000010288	psma3	5.68605	1.84956	0.32528	0.00346938
ENSORLG00000016453		34.7057	11.3201	0.326173	0.0069358
ENSORLG00000003239	rps8b	11.6256	3.82792	0.329266	0.0133903
ENSORLG00000012601	IDH2	10.8187	3.58598	0.331462	0.0250401
ENSORLG00000017576	cmlc1	12.4606	4.13191	0.331598	0.00194235
ENSORLG00000017618	myl13	12.4606	4.13191	0.331598	0.00194235
ENSORLG00000008916	capza1b	2.97884	0.996467	0.334515	0.0377942
ENSORLG00000018265	tpd52l2b	4.23494	1.43139	0.337996	0.0420804
ENSORLG00000000246	CAMK2B	4.77422	1.63982	0.343474	0.0289145
ENSORLG00000000900	camk2b1	4.77422	1.63982	0.343474	0.0289145
ENSORLG00000004170	CAMK2G	4.77422	1.63982	0.343474	0.0289145
ENSORLG00000005088	camk2d2	4.77422	1.63982	0.343474	0.0289145
ENSORLG00000010682	camk2g1	4.77422	1.63982	0.343474	0.0289145
ENSORLG00000012861	camk2a	4.77422	1.63982	0.343474	0.0289145
ENSORLG00000019918		4.77422	1.63982	0.343474	0.0289145
ENSORLG00000019668	TNNT3	18.9254	6.60732	0.349125	0.0132952
ENSORLG00000006281	pck2	7.12302	2.49226	0.349888	0.0354324
ENSORLG00000002564	acaa2	5.32764	1.865	0.350062	0.0248831
ENSORLG00000016999	adssl1	7.71475	2.70134	0.350153	0.0428163
ENSORLG00000002618	aco2	19.3061	6.77495	0.350922	0.0354212
ENSORLG00000005210	GB-ALPHA1	13.2374	4.64816	0.351139	0.0415771
ENSORLG00000002906	mdha	26.2823	9.26432	0.352492	0.0312742
ENSORLG00000018537	ahsg	5.63358	1.99198	0.353592	0.0408202
ENSORLG00000012323	arhgdia	7.07055	2.50177	0.353829	0.0401683
ENSORLG00000008985	got2b	18.5011	6.60976	0.357263	0.0410661
ENSORLG00000008218	IDH2	32.5501	11.8049	0.362668	0.0497284
ENSORLG00000003253	gatm	6.22528	2.28317	0.366758	0.040103
ENSORLG00000000551	tnni2a.2	3.27473	1.20555	0.368137	0.0408107
ENSORLG00000017237	OLPC4	2.683	0.997875	0.371925	0.042717
ENSORLG00000016464		55.358	21.8416	0.394552	0.00368377
ENSORLG00000014073	rps19	5.62353	2.24438	0.399106	0.0421251
ENSORLG00000000565	rpl12	8.33071	3.41111	0.409462	0.00488486
ENSORLG00000010830	fabp11a	8.9366	3.67574	0.411312	0.00683099
ENSORLG00000007313	pfn2l	8.61244	3.71374	0.431207	0.00035556
ENSORLG00000007460	zgc:153867	16.9147	7.3106	0.432203	0.0115571
ENSORLG00000019162	rpl23	5.3418	2.49732	0.467505	0.0245958
ENSORLG00000005230	GB-BETA4	38.4594	18.0852	0.470242	0.0385577
ENSORLG00000000678	TNNT3	42.7574	20.2429	0.473435	0.0343039
ENSORLG00000011589	rbm4.3	1.48945	3.24889	2.18127	0.0331359
ENSORLG00000019164	cndp2	2.6588	5.88501	2.21341	0.00659619
ENSORLG00000001833	hnrnpd	3.90076	8.63828	2.21451	0.00399946
ENSORLG00000019422		10.1744	22.6267	2.22389	0.0417046
ENSORLG00000019520	psmb3	3.5948	8.04893	2.23905	0.0223371
ENSORLG00000003517	ATP5B	65.5789	154.301	2.35291	0.00139427
ENSORLG00000003211	CKMT2	5.68605	13.5057	2.37523	0.00211449
ENSORLG00000003740	atp5a1	79.8513	191.639	2.39996	0.000242461
ENSORLG00000009975	gyg1b	5.6094	13.8097	2.46188	0.00314196
ENSORLG00000000020		28.7261	74.2676	2.58537	0.0114789
ENSORLG00000000161	HIST1H4H	28.7261	74.2676	2.58537	0.0114789
ENSORLG00000000163		28.7261	74.2676	2.58537	0.0114789
ENSORLG00000000175		28.7261	74.2676	2.58537	0.0114789
ENSORLG00000000874	si:ch211-113a14.17	28.7261	74.2676	2.58537	0.0114789
ENSORLG00000001169		28.7261	74.2676	2.58537	0.0114789
ENSORLG00000001326	si:ch211-113a14.6	28.7261	74.2676	2.58537	0.0114789
ENSORLG00000001336		28.7261	74.2676	2.58537	0.0114789
ENSORLG00000011793	zgc:165555	28.7261	74.2676	2.58537	0.0114789
ENSORLG00000011795		28.7261	74.2676	2.58537	0.0114789
ENSORLG00000019711		28.7261	74.2676	2.58537	0.0114789
ENSORLG00000019712		28.7261	74.2676	2.58537	0.0114789
ENSORLG00000015136	ranbp1	1.82702	4.97847	2.72491	0.012222
ENSORLG00000005276	gnb2l1	5.63363	15.9884	2.83803	0.0283131
ENSORLG00000003704	crygn2	16.8489	49.1888	2.91941	0.00281621
ENSORLG00000006033	gapdhs	35.3501	106.096	3.0013	0.0331147
ENSORLG00000001486	psma4	5.05603	15.434	3.05258	0.00265302
ENSORLG00000001351	RAB7A	3.92082	12.0039	3.06158	0.0103561
ENSORLG00000016888	rab7	3.92082	12.0039	3.06158	0.0103561
ENSORLG00000009242		2.43549	7.67013	3.14932	0.0193036
ENSORLG00000010889		8.34485	28.7159	3.44115	0.00207963
ENSORLG00000003821	crybb1l1	21.5023	77.2048	3.59054	0.00381592
ENSORLG00000020544	cryba2a	24.5172	88.4258	3.60669	0.000568823
ENSORLG00000016425	cox6b2	3.24641	12.0317	3.70616	0.0219789
ENSORLG00000001200	UBBP4	12.7949	47.6312	3.72267	0.0106809
ENSORLG00000002576	rps27a	12.7949	47.6312	3.72267	0.0106809
ENSORLG00000012032	ubc	12.7949	47.6312	3.72267	0.0106809
ENSORLG00000003323	hexb	1.53113	6.03999	3.9448	0.000722491
ENSORLG00000017766	seta	3.32317	16.5292	4.97394	0.00726756
ENSORLG00000003008	pabpc1b	0.509687	2.63612	5.17204	0.0414364
ENSORLG00000002691	pabpc1a	0.731585	3.92283	5.36209	0.0143916
ENSORLG00000013425	LSM5	1.24937	7.27387	5.82203	0.0356611
ENSORLG00000007012	g3bp2	0.953505	6.01664	6.31003	0.00151217
ENSORLG00000011422	g3bp1	0.953505	6.01664	6.31003	0.00151217
ENSORLG00000010586	snrpd3	0.8162	5.15679	6.31804	0.00469432
ENSORLG00000006399	sord	2.42545	16.3276	6.7318	0.00280382
ENSORLG00000006589	prdx4	0.8162	5.80014	7.10627	0.00402186
ENSORLG00000010782	SERBP1	1.0275	7.80767	7.59872	0.0375967
ENSORLG00000008546	uba52	2.66887	20.3222	7.61455	0.00593547
ENSORLG00000001108	crybb1	32.9903	253.387	7.68067	0.00626597
ENSORLG00000002937	pcna	1.53512	12.2378	7.97191	0.00462397
ENSORLG00000011616	isoc2	0.298389	2.38035	7.97734	0.00852297
ENSORLG00000016761	aldh16a1	0.298389	2.38903	8.00643	0.0300217
ENSORLG00000010972	galcb	1.30923	10.6396	8.12665	0.0197032
ENSORLG00000008154	cryba1a	0.298389	2.51198	8.41849	0.0348667
ENSORLG00000017936	and2	2.40459	20.2777	8.43294	0.00419518
ENSORLG00000012350	epdl1	1.01334	9.94657	9.81566	0.041649
ENSORLG00000005256	rps28	1.59096	16.9194	10.6347	0.0158988
ENSORLG00000005872	fth1a	0.298389	3.17868	10.6528	0.0274706
ENSORLG00000019178		0.298389	3.37303	11.3041	0.0248265
ENSORLG00000014873	hce	0.298389	3.62163	12.1373	0.0435966
ENSORLG00000001692	rbmx	0.298389	3.90084	13.073	0.0387163
ENSORLG00000016704	eci1	0.509687	6.82501	13.3906	0.00881499
ENSORLG00000016221	TLR5	0.298389	4.243	14.2197	0.00883595
ENSORLG00000016606	rad23aa	0.298389	4.9316	16.5274	0.0156887
ENSORLG00000005072	rbp4	0.298389	4.97998	16.6896	0.0437493
ENSORLG00000009349	mpx	0.298389	9.01515	30.2127	0.0456159
ENSORLG00000019221	rplp1	0.298389	11.8357	39.6653	0.00414274
ENSORLG00000017387		0.298389	12.9877	43.5262	0.0428384
